# Supplementary material
Source: publisher site journal article supplement (https://www.dovepress.com/article/397749)
Supplement: Supplementary file 1 [file get_supplementary_file.php]

### **Supplementary methods and materials**

Analysis of the IL34 expressions in 208 single-cell datasets (<https://ngdc.cncb.ac.cn/cancerscem/index>) with 638,341 cell samples. To study the correlation between the IL-34 and the macrophage infiltration, we used the Spearman correlation analysis by using the Timer web tool ( <http://timer.cistrome.org/> ) and considered the significant results ( $P < 0.05$ ). In considering M1/M2 and comparing the infiltration associated with IL-34 in all significant cancer types, the independent was applied to study the difference in the infiltration of both types of macrophages.
